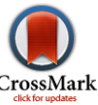

# The Z Mutation Alters the Global Structural Dynamics of $\alpha_1$ -Antitrypsin

Victoria A. Hughes<sup>1</sup>, Robert Meklemburg<sup>2</sup>, Stephen P. Bottomley<sup>1</sup>, Patrick L. Wintrode<sup>2\*</sup>

**1** Department of Biochemistry and Molecular Biology, Monash University, Clayton, Victoria, Australia, **2** Department of Pharmaceutical Sciences, University of Maryland School of Pharmacy, Baltimore, Maryland, United States of America

## Abstract

$\alpha_1$ -Antitrypsin ( $\alpha_1$ AT) deficiency, the most common serpinopathy, results in both emphysema and liver disease. Over 90% of all clinical cases of  $\alpha_1$ AT deficiency are caused by the Z variant in which Glu342, located at the top of s5A, is replaced by a Lys which results in polymerization both *in vivo* and *in vitro*. The Glu342Lys mutation removes a salt bridge and a hydrogen bond but does not effect the thermodynamic stability of Z  $\alpha_1$ AT compared to the wild type protein, M  $\alpha_1$ AT, and so it is unclear why Z  $\alpha_1$ AT has an increased polymerization propensity. We speculated that the loss of these interactions would make the native state of Z  $\alpha_1$ AT more dynamic than M  $\alpha_1$ AT and that this change renders the protein more polymerization prone. We have used hydrogen/deuterium exchange combined with mass spectrometry (HXMS) to determine the structural and dynamic differences between native Z and M  $\alpha_1$ AT to reveal the molecular basis of Z  $\alpha_1$ AT polymerization. Our HXMS data shows that the Z mutation significantly perturbs the region around the site of mutation. Strikingly the Z mutation also alters the dynamics of regions distant to the mutation such as the B, D and I helices and specific regions of each  $\beta$ -sheet. These changes in global dynamics may lead to an increase in the likelihood of Z  $\alpha_1$ AT sampling a polymerogenic structure thereby causing disease.

**Citation:** Hughes VA, Meklemburg R, Bottomley SP, Wintrode PL (2014) The Z Mutation Alters the Global Structural Dynamics of  $\alpha_1$ -Antitrypsin. PLoS ONE 9(9): e102617. doi:10.1371/journal.pone.0102617

**Editor:** Human Rezaei, INRA, France

**Received:** June 19, 2013; **Accepted:** June 12, 2014; **Published:** September 2, 2014

**Copyright:** © 2014 Hughes et al. This is an open-access article distributed under the terms of the Creative Commons Attribution License, which permits unrestricted use, distribution, and reproduction in any medium, provided the original author and source are credited.

**Funding:** This work was funded by the The National Health and Medical Research Council (NHMRC) (Aus). The funders had no role in study design, data collection and analysis, decision to publish, or preparation of the manuscript.

**Competing Interests:** The authors have declared that no competing interests exist.

\* Email: pwintrode@rx.umaryland.edu

## Introduction

The misfolding and subsequent polymerization of members of the serpin superfamily leads to a variety of diseases collectively known as the Serpinopathies [1]. The most common serpinopathy is  $\alpha_1$ -antitrypsin ( $\alpha_1$ AT) deficiency, which affects approximately 1 in 2000 people [2]. The serpin,  $\alpha_1$ AT, is synthesized by hepatocytes and released into the circulation where it protects the lung from the action of neutrophil elastase. Over 70 mutations have been identified that lead to  $\alpha_1$ AT deficiency. The most common pathological variant, accounting for 95% of all clinical cases, is the Z variant [3,4,5] in which Glu342, which is located at the junction between the top of s5A and the base of the reactive center loop (RCL), is replaced by a Lys (Fig. 1a). The presence of this mutation results in the removal of both a salt bridge to Lys290 and a hydrogen bond to Thr203. The loss of these interactions brings about misfolding and polymerization of the protein within the endoplasmic reticulum of hepatocytes resulting in a lack of secretion and is characterized by a reduction in plasma levels to 10–15% of normal [6]. The polymerized Z  $\alpha_1$ AT damages the hepatocytes and predisposes the carrier to liver disease. The decreased plasma levels give rise to severe early onset emphysema.

The molecular basis of Z  $\alpha_1$ AT polymerization is not completely understood. The structure, stability and polymerization characteristics of native Z  $\alpha_1$ AT have been studied using a range of biochemical and biophysical techniques [4,7,8,9]. These data reveal that Z  $\alpha_1$ AT, in contrast to wild type  $\alpha_1$ AT (M  $\alpha_1$ AT), polymerizes rapidly when incubated at physiological temperatures

[4,6,10]. The crystal structure of Z  $\alpha_1$ AT has not yet been determined however it is still an efficient proteinase inhibitor indicating that it possesses the serpin fold [9,10]. In support of this the equilibrium unfolding of Z  $\alpha_1$ AT has been studied and shown to be the same as M  $\alpha_1$ AT suggesting that compensating interactions are formed in Z  $\alpha_1$ AT to counteract for the loss of the two native state interactions [8,11]. Two additional pieces of experimental evidence suggest that there are substantial differences within the native state of Z  $\alpha_1$ AT. First, recent spectroscopic data using mutants of M and Z  $\alpha_1$ AT have shown that there are structural differences between the proteins [8,11]. Secondly, kinetic unfolding studies indicated that in the three state unfolding reaction the transition from the native state to a partially folded intermediate state proceeds almost two times faster for Z  $\alpha_1$ AT than for M  $\alpha_1$ AT [4]. Therefore, we speculated that the native state of Z  $\alpha_1$ AT may be more dynamic than M  $\alpha_1$ AT and that it is this change which renders the protein prone to polymerization. To examine this hypothesis we have used hydrogen/deuterium exchange combined with mass spectrometry (HXMS) to determine the structural and dynamic differences between native Z and M  $\alpha_1$ AT and to reveal the molecular basis of Z  $\alpha_1$ AT polymerization.

## Results

M and Z  $\alpha_1$ AT appear to possess similar thermodynamic stability [4,8], yet native Z  $\alpha_1$ AT, incubated at physiological temperatures (37–41°C), readily polymerizes whereas M  $\alpha_1$ AT

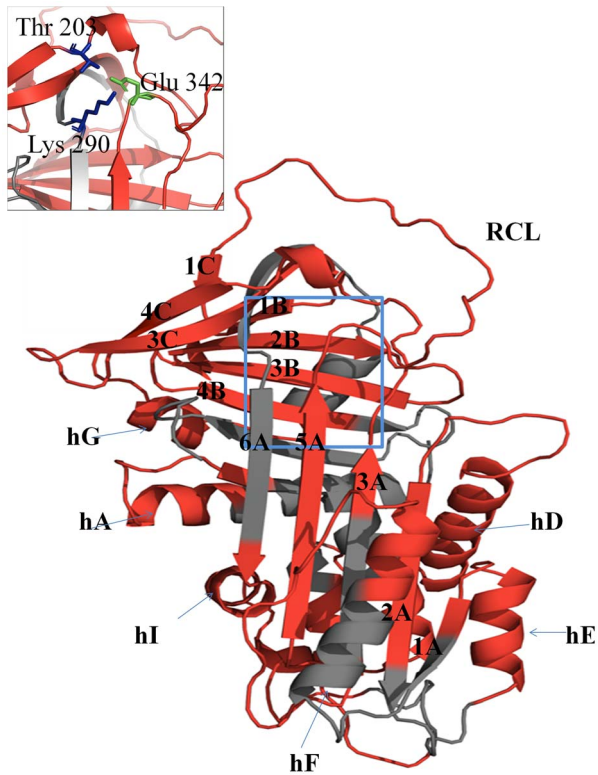

**Figure 1. The structure and sequence of  $\alpha_1$ AT.** (A) Ribbon diagram of M  $\alpha_1$ AT (PDB: 1QLP) [24] is shown and the peptic fragments used in this study are highlighted in red. The insert shows a close up view of the region around Glu342, the site of the Z mutation. Figures are prepared using PyMol (2002). The PyMOL Molecular Graphic System, San Carlos, CA, U.S.A.).  
doi:10.1371/journal.pone.0102617.g001

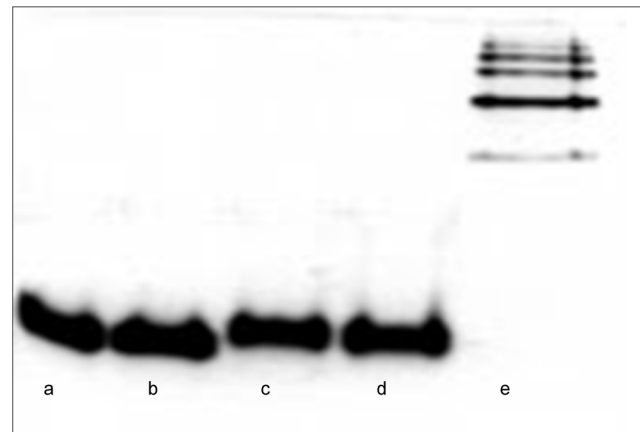

**Figure 2. Native Page analysis of M and Z  $\alpha_1$ AT under HDX conditions.** M and Z  $\alpha_1$ AT were incubated in D<sub>2</sub>O buffered with 10 mM Tris (pD 8) at 25°C for up to 2500 seconds. Samples of the proteins were then analyzed by 10% Native PAGE. (A) M  $\alpha_1$ AT t=0 seconds; (B) M  $\alpha_1$ AT t=2500 seconds; (C) Z  $\alpha_1$ AT t=0 seconds; (D) Z  $\alpha_1$ AT t=2500 seconds and (E) Z  $\alpha_1$ AT polymers purified directly from *P. pastoris* 10J.  
doi:10.1371/journal.pone.0102617.g002

does not [6,8,9]. One potential explanation for the rapid polymerization of Z  $\alpha_1$ AT is that it is in, or can access more readily, a non-native, yet active, conformation [12,13]. In order to examine this possibility we compared the native state dynamics of both M and Z  $\alpha_1$ AT using HXMS coupled with pepsin digestion, to measure the flexibility of specific regions within these serpins [14].

Both M and Z  $\alpha_1$ AT were expressed in *P. pastoris* and purified as previously described [10]. The H/D exchange of the M  $\alpha_1$ AT

**Table 1.** Details of the peptides derived from pepsin digestion and tandem mass spectrometry experiments.

| Residue Number | Secondary structure elements | Amino acid sequence (Full stop indicates digestion site) | MW      | Z    | MH <sup>2+</sup> |
|----------------|------------------------------|----------------------------------------------------------|---------|------|------------------|
| 38–51          | hA- $\beta$ 6B               | L.YRQLAHQSNSTNI.F                                        | 1530.75 | 2.00 | 765.875          |
| 38–62          | hA- $\beta$ 6B               | L.YRQLAHQSNSTNIFFSPVIATA.F                               | 2464.24 | 2.00 | 1232.62          |
| 62–77          | hB-hC                        | F.AMLSLGTKADTHDEILE                                      | 1714.87 | 2.00 | 857.93           |
| 81–100         | hD                           | N.FNLTEIPEAQIHEGFQELL                                    | 2115.04 | 2.00 | 1058.02          |
| 101–119        | hD- $\beta$ 2A               | L.LRRTLNPQSDQLQLTTGNGFL.L                                | 2216.17 | 2.00 | 1108.58          |
| 127–142        | hE- $\beta$ 1A               | L.VDKFLEDVKKLYHSEA.F                                     | 1921.01 | 2.00 | 961.00           |
| 160–172        | hF-loop                      | D.YVEKGTQGGKIVDL.V                                       | 1449.79 | 2.00 | 725.40           |
| 171–182        | loop                         | D.LVKELDRDVTVF.A                                         | 1334.73 | 2.00 | 667.87           |
| 191–212        | Loop                         | G.KWERPFVVKDTEEE                                         | 1691.82 | 2.00 | 845.91           |
| 215–227        | $\beta$ 4C- $\beta$ 3C       | F.HVDQVTTVKVPMKRLGMF.N                                   | 2217.17 | 2.00 | 1109.09          |
| 227–240        | $\beta$ 1B- $\beta$ 2B       | F.NIQHCKKLSWVLL.L                                        | 1555.84 | 2.00 | 778.42           |
| 240–252        | $\beta$ 2B- $\beta$ 3B       | L.LMKYLGNAIF.F                                           | 1341.72 | 2.00 | 671.36           |
| 252–272        | hG-hH                        | F.FLPDEGKLQHLLENLTHD.I                                   | 2135.04 | 2.00 | 1068.02          |
| 297–303        | hI                           | T.YDLKSVL.G                                              | 837.47  | 1.00 |                  |
| 304–317        | Hi-loop                      | L.GQLGITKVFNSGAD.L                                       | 1406.73 | 2.00 | 703.86           |
| 325–338        | $\beta$ 5A                   | E.APLKLSKAVHKAVL.T                                       | 1474.95 | 2.00 | 737.97           |
| 339–353        | RCL                          | L.TIDKKGTEAAGAMFLE                                       | 1552.80 | 2.00 | 776.90           |
| 353–372        | RCL- $\beta$ 1C- $\beta$ 4B  | L.EAIPMSIPPEVKFNKPFVFL                                   | 2190.17 | 2.00 | 1095.58          |
| 372–384        | $\beta$ 4B- $\beta$ 5B       | F.LMIEQNTKSPFL.M                                         | 1420.75 | 2.00 | 710.88           |

The relative masses used in this study were determined using Sequest.  
doi:10.1371/journal.pone.0102617.t001

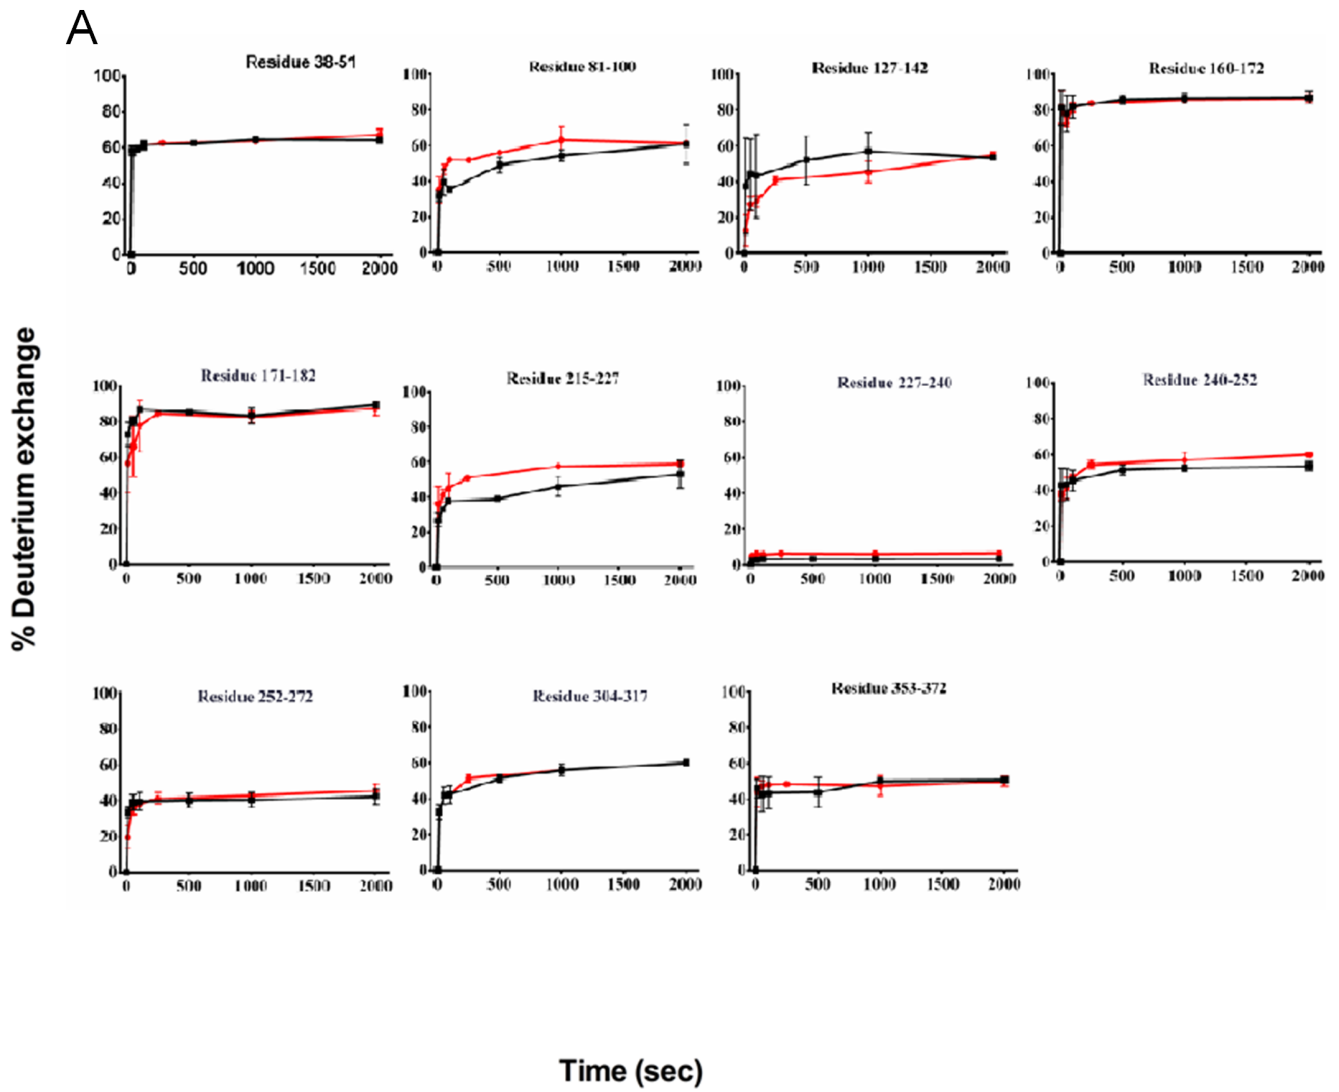

**B**

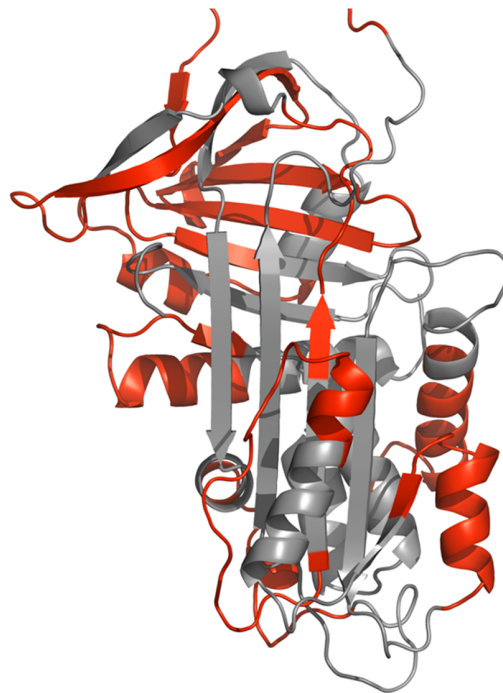

**Figure 3. Peptic fragments derived from  $\alpha_1$ AT that show comparable exchange kinetics in M and Z  $\alpha_1$ AT.** (A) The kinetics of deuterium incorporation into M  $\alpha_1$ AT (black) and Z  $\alpha_1$ AT (red) by individual peptic fragments which show comparable exchange are shown. The individual data points are the average of three independent experiments for clarity the error bars are not shown. (B) Crystal structure of M  $\alpha_1$ AT (PDB: 1QLP [24]) indicating the location of peptic fragments with comparable exchange highlighted in red.  
doi:10.1371/journal.pone.0102617.g003

used in this study is in excellent agreement with our previous study using M  $\alpha_1$ AT produced in *E. coli* [15]. Tandem mass spectrometry experiments were carried out and 132 overlapping peptic fragments were identified from both M and Z  $\alpha_1$ AT. A comparison of H/D exchange of native M and Z  $\alpha_1$ AT was performed at pD 8 and 25°C followed by pepsin digestion and HPLC-MS to quantify the mass of each peptic fragment. Analysis of the pepsin digest of undeuterated M and Z  $\alpha_1$ AT under the rapid HPLC gradient required for the H/D experiments identified 19 peptic fragments, with good signal to noise ratio (Table 1). These fragments cover 79% of the entire  $\alpha_1$ AT molecule and are well distributed throughout the sequence; the only significant gaps in coverage encompass regions around helices A and H (Fig. 1a,b).

Using previously established procedures in our laboratory [15,16] we were able to measure the kinetics of deuterium incorporation for the 19 peptic fragments (Table 1), from both M and Z  $\alpha_1$ AT over a period of 2000 sec. The first experimental point measured was 10 sec after isotope exchange was initiated. Deuterium labelling was performed at 25°C, with deuteration times ranging from 10 to 2000 s. Under these experimental conditions, both M and Z  $\alpha_1$ AT remained in a monomeric form during the deuterium labelling time (Fig. 2).

Twelve pairs of peptides from M and Z  $\alpha_1$ AT displayed similar kinetics and extent of deuterium incorporation. These data therefore suggest that the Z mutation had minimal structural or dynamic effects on the serpin in these regions which are spread throughout the molecule (Fig. 3).

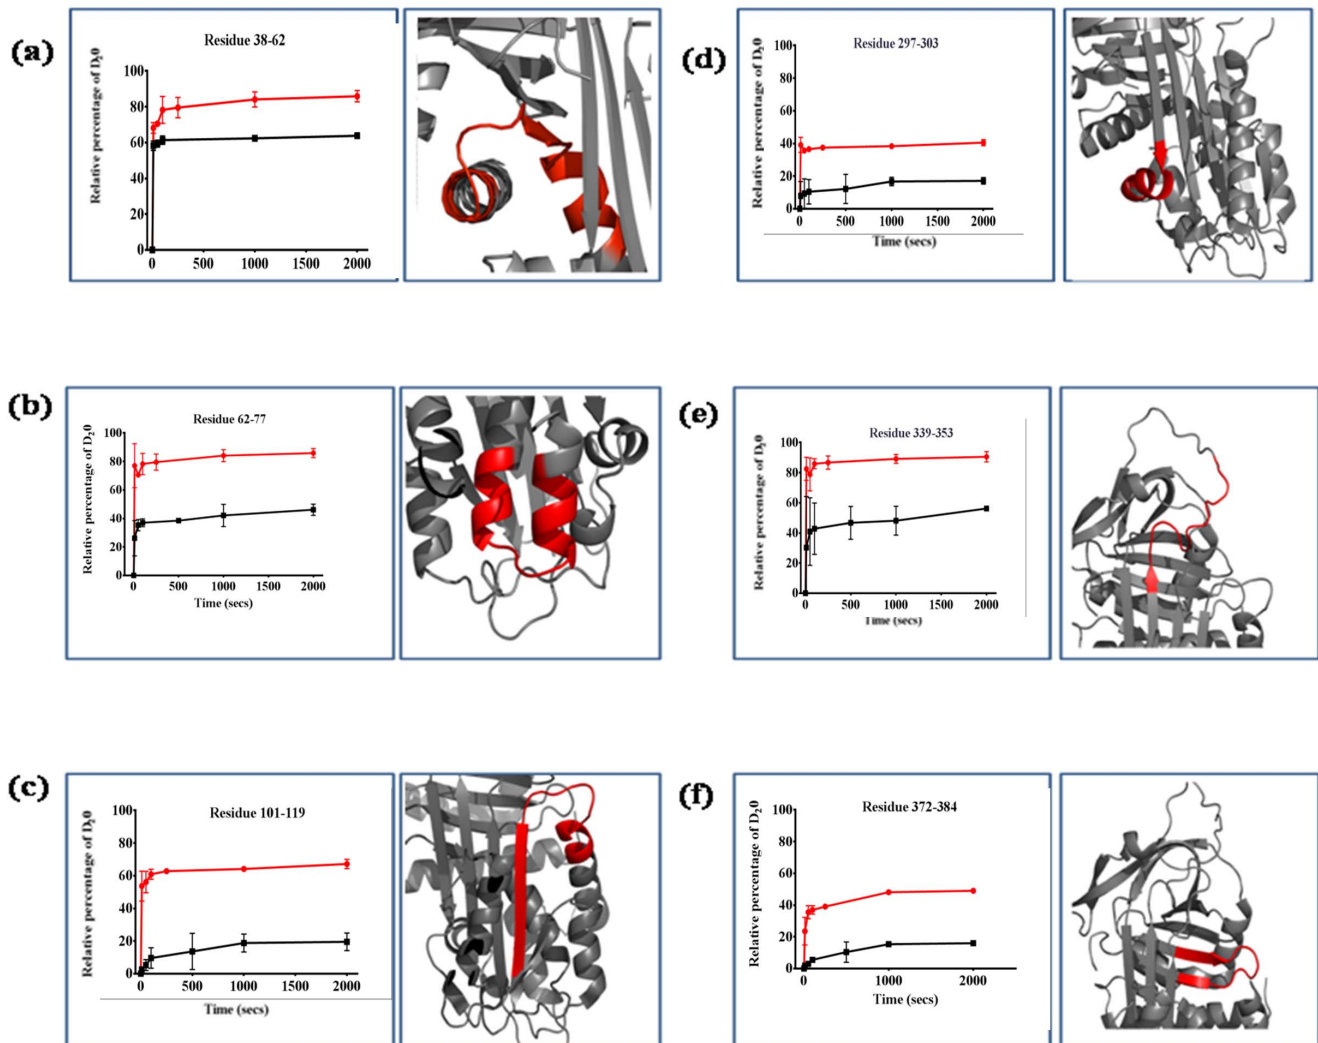

**Figure 4. Peptic fragments derived from  $\alpha_1$ AT that display enhanced deuterium incorporation in Z  $\alpha_1$ AT.** The kinetics of deuterium incorporation into M  $\alpha_1$ AT (black) and Z  $\alpha_1$ AT (red) of peptic fragments which show significant increased deuterium uptake in Z compared to M  $\alpha_1$ AT. A close up view of the location of the peptide fragment (red) within  $\alpha_1$ AT (PDB: 1QLP)[24] is shown. The individual data points are the average of three independent experiments for clarity the error bars are not shown.  
doi:10.1371/journal.pone.0102617.g004

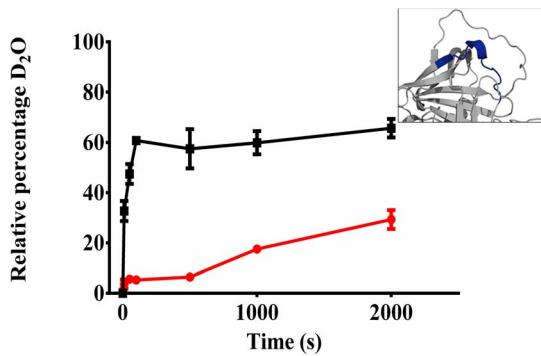

**Figure 5. Peptic fragments derived from  $\alpha_1$ AT that display enhanced deuterium incorporation in M  $\alpha_1$ AT.** (A) The kinetics of deuterium incorporation into M  $\alpha_1$ AT (black) and Z  $\alpha_1$ AT (red) of peptic fragments which show significant increased deuterium uptake in M compared to Z  $\alpha_1$ AT. Insert- Crystal structure of M  $\alpha_1$ AT (PDB: 1QLP) [24] indicating the location of peptic fragments with decreased exchange highlighted in blue. The individual data points are the average of three independent experiments for clarity the error bars are not shown. doi:10.1371/journal.pone.0102617.g005

Six peptides showed a significant enhancement of deuterium exchange in Z  $\alpha_1$ AT compared to M  $\alpha_1$ AT (Fig. 4a–f). The extent of labelling was increased for peptic fragments 38–62 (hA–hB), 62–77 (hB–hC), 101–119 ( $\beta$ 2A), 297–303 ( $\beta$ 6A–hI), 339–353 ( $\beta$ 5A-Linker) and 372–384 ( $\beta$ 4B– $\beta$ 5B). Results for these peptic fragments were mapped onto the crystal structure of M  $\alpha_1$ AT with the peptides showing an increase in exchange of the peptide in Z  $\alpha_1$ AT compared to M  $\alpha_1$ AT coloured red (Fig. 4a–f).

Only one peptide, 191–212, (the loop connecting  $\beta$ 3A and  $\beta$ 4C) showed a significant reduction of deuterium exchange in Z  $\alpha_1$ AT compared to M  $\alpha_1$ AT (Fig. 5a,b). Results for this peptide was mapped onto the structure of M  $\alpha_1$ AT with the peptide showing an increase in exchange in M  $\alpha_1$ AT compared to Z  $\alpha_1$ AT coloured in blue (Fig. 5b).

Three peptic fragments, 127–142 (hE– $\beta$ 1A), 191–212 ( $\beta$ 3A– $\beta$ 4C) and 252–272 ( $\beta$ 3B–hG–hH), displayed greater than two-fold protection in Z  $\alpha_1$ AT in comparison to M  $\alpha_1$ AT after only 10 seconds of deuterium labelling (Fig. 6a). Under these conditions, amides in unfolded regions of the molecule will undergo nearly complete exchange, while hydrogens in folded regions remain largely unexchanged. This type of pulse labelling has been shown to be an effective tool for monitoring site specific folding and unfolding in proteins [17]. The hydrogens in these 3 peptides are less labile due to decreased flexibility or a different conformation of the peptide in Z  $\alpha_1$ AT. It is also clear that there is considerable exchange in peptic fragments 38–62 ( $\beta$ 6B–hB), 62–77 (hB–hC), 101–119 (hD– $\beta$ 2A), 215–227 ( $\beta$ 3C) 297–303 ( $\beta$ 6A–hI), 325–338 ( $\beta$ 5A), 339–353 ( $\beta$ 5A-Linker) and 372–384 ( $\beta$ 4B– $\beta$ 5B) (Fig. 6B). These data suggest that regions covered by these peptides are either partially unfolded or marginally stable in Z  $\alpha_1$ AT.

Significant differences in deuterium incorporation are also observed at longer exchange times and suggest that globally Z  $\alpha_1$ AT is more dynamic than M  $\alpha_1$ AT. To better represent the data we have grouped the deuterium exchange into classes depending on the exchange at 2000 seconds. Class 1 peptides exchange rapidly in the native state with greater than 80% exchange in 2000 seconds. Peptic fragments 62–77 encompassing the helices B–C show rapid exchange in Z  $\alpha_1$ AT only, suggesting a lack of stable secondary structure leading to a more dynamic molecule. The rapid exchange of the peptic fragments 339–352 and 352–372

corresponding to the RCL show an enhanced exchange suggesting less interactions in Z than WT  $\alpha_1$ AT.

Class 2 peptides show moderate exchange (30–80%) at 2000 seconds in the native state and are shown in yellow. Residues within areas of high  $\alpha$ -helical and  $\beta$ -sheet content are expected to exchange more slowly than those of turns and loops and make up the majority of peptides seen for class 2 [18]. Peptic fragments 38–51, 127–142, and 304–317 associated with helix D, E, G and I respectively show only a 60% exchange at 2000 seconds in M and Z  $\alpha_1$ AT. Residues 191–212 (the loop connecting  $\beta$ 3A and  $\beta$ 4C) also fall into the category although this is the only peptide that shows a reduction in exchange in Z  $\alpha_1$ AT.

In M  $\alpha_1$ AT, peptic fragments that are protected from exchange include the top of hD and  $\beta$ 2A,  $\beta$ 1B– $\beta$ 2B,  $\beta$ 6A–hI and the loop connecting  $\beta$ 4B to  $\beta$ 5B, (101–119, 227–240, 297–303 and 372–384) previously attributed to the hydrophobic core [15,19] and are described as showing class 3 exchange in yellow in figure 7. Z  $\alpha_1$ AT shares with M  $\alpha_1$ AT only residues (227–240) that show significant protection and differently from M protein displays residues 191–212 having high protection as discussed before, both peptides belonging to class 3.

## Discussion

The structural integrity of a protein generally relies on its ability to adopt and maintain a unique native state. For members of the serpin superfamily the integrity of the native state must also allow local motions that facilitate proteinase inhibition. However, these motions can be hijacked and used to promote disease causing polymerization. In the case of Z  $\alpha_1$ AT we have a protein whose fold and apparent thermodynamic stability are similar to M  $\alpha_1$ AT, yet it polymerizes from the native state much more rapidly [4]. Using HDX we have examined the global and local changes that arise in the natively folded ensembles of Z  $\alpha_1$ AT, this study shows that previous studies may have underestimated the effect of the E242K substitution on the molecule and the effects are not just localised at the site of mutation but extend to distant regions of the structure.

The HDX results presented here reveal that the structural effects due to the E342K mutation are not distributed uniformly throughout the structure, but are instead localized in specific regions. Exchange at 10 seconds indicates partial loss of structure in several regions, the most dramatic being  $\beta$ 2A and the top of hD (Fig. 6a). Compared with M  $\alpha_1$ AT, Z  $\alpha_1$ AT has lost  $\sim$ 8 hydrogen bonds in this region, suggesting significant disruption of interactions between  $\beta$ 2A and the surrounding structural elements. Previous molecular dynamics simulations support the idea that the effects of the Glu342Lys substitution can propagate to this region. While significant disruption of  $\beta$ 2A was not observed on the 50 ns timescale to the simulations, a large change in the conformation of the hD– $\beta$ 2A loop was observed, consistent with our HDX results [11]. The top of helix F remains highly dynamic as previously seen in M  $\alpha_1$ AT [15,19]. Deuterium levels at 10 s also indicate that the region covered by residues 339–353 has lost  $\sim$ 3 hydrogen bonds, suggesting a loss of structure at the top of  $\beta$ -sheet A that is an important site in the early stages of RCL insertion. Additionally, there is disruption of hydrogen bonds between the central portion of  $\beta$ 3A and the adjacent  $\beta$ 2A and  $\beta$ 5A. Loss of hydrogen bonds in these regions, together with smaller but still significant losses in helices A, B, and C, clearly demonstrates that the E342K mutation disrupts native structure in areas both distant from and close to the mutation site. In addition to the loss of hydrogen bonds, deuterium uptake at 10 seconds also indicates the formation of additional hydrogen bonds in regions spanned by residues 127–142, 191–212

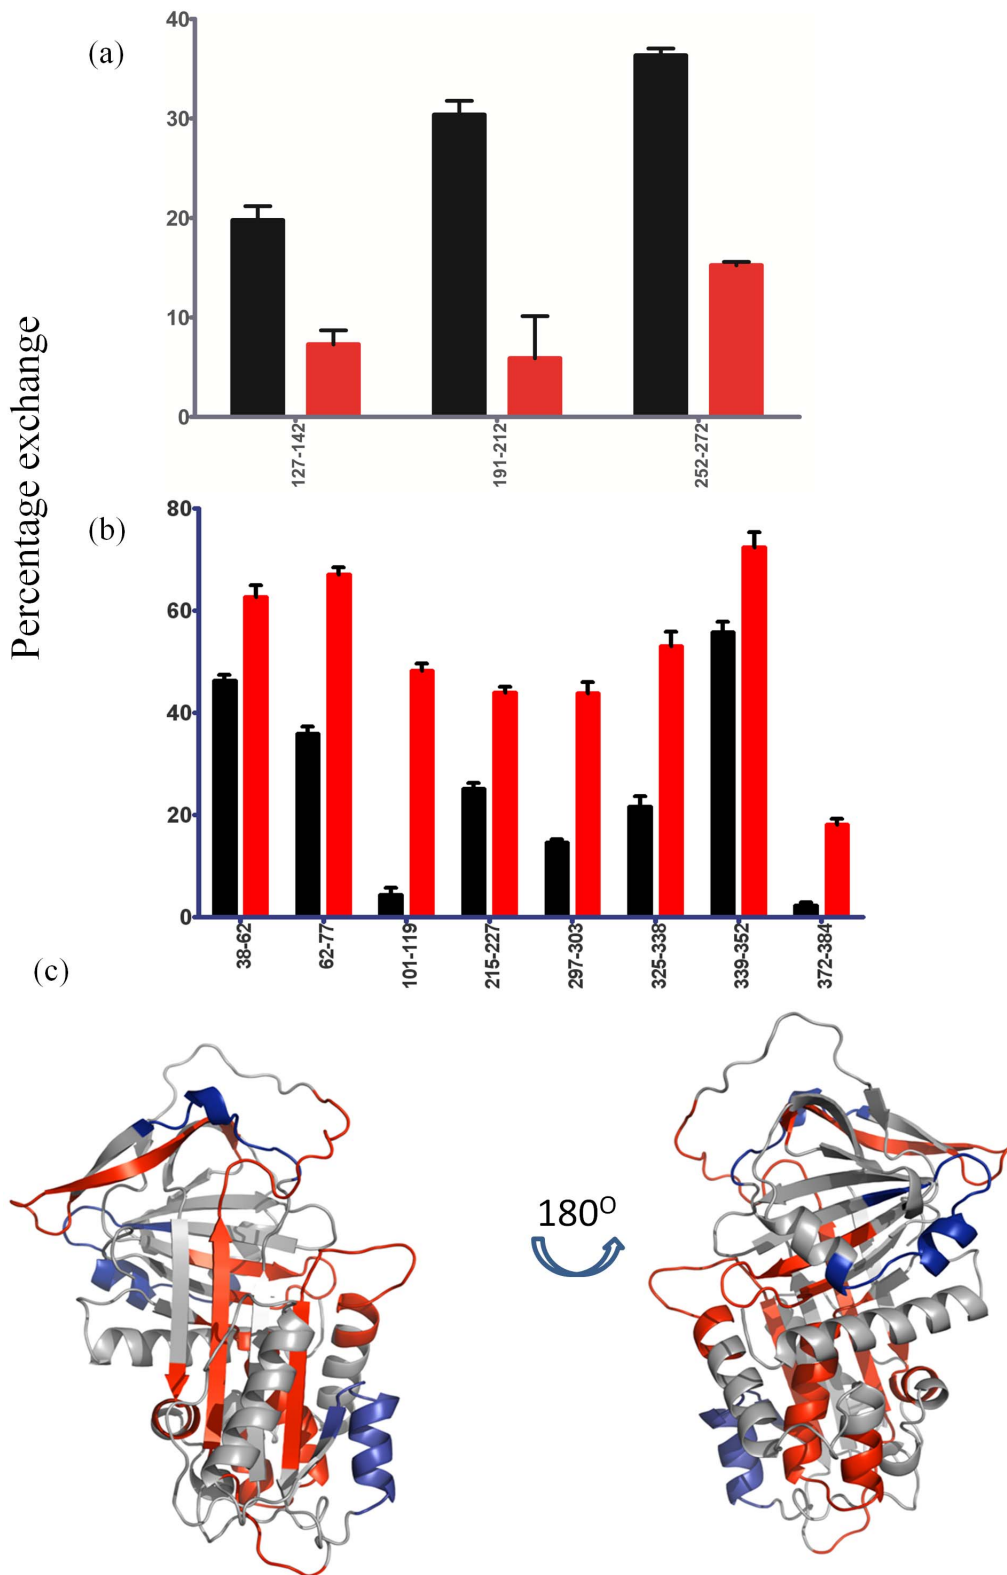

**Figure 6. Regions in  $\alpha_1$ AT that are affected by the Z mutation.** (A) Peptides that displayed decreased exchange in Z  $\alpha_1$ AT (Red) compared to M  $\alpha_1$ AT (Black); (B) Peptides that displayed enhanced exchange in Z  $\alpha_1$ AT (Red) compared to M  $\alpha_1$ AT (Black) at 10 sec. (C) The structure of  $\alpha_1$ AT (PDB: 1QLP) [24] indicating residues with an increased  $D_2O$  uptake in Z (red) and decreased  $D_2O$  uptake in Z (Blue) after 10 seconds of incubation in  $D_2O$ . doi:10.1371/journal.pone.0102617.g006

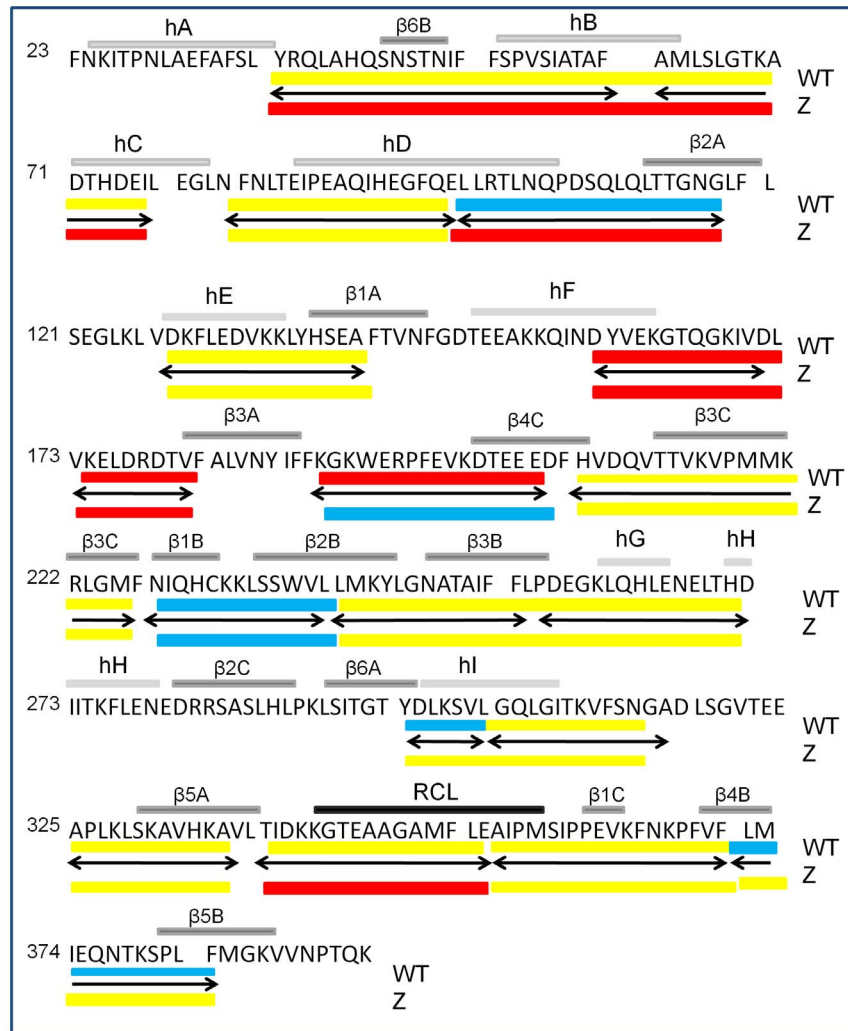

**Figure 7. Differences in hydrogen exchange at 2000 seconds between M and Z  $\alpha_1$ AT.** The amino acid sequence of  $\alpha_1$ AT is shown with secondary structure highlighted above the sequence. The 18 peptides used in the study are noted, as double headed arrows. The peptides for both M and Z  $\alpha_1$ AT are colored according to the percentage deuterium incorporation at 2000 seconds: class 1 80–100% (red), class 2 30–80% (yellow) and class 3 0–30% (blue).

doi:10.1371/journal.pone.0102617.g007

and 252–272, in Z  $\alpha_1$ AT compared to M. These regions correspond to hE- $\beta$ 1A,  $\beta$ 3A- $\beta$ 4C and hG-hH respectively. However, the added hydrogen bonds do not appear to be stable, as the additional protection against deuterium uptake in Z  $\alpha_1$ AT is lost within 100 seconds (for peptides 191–212 and 352–372) to 1000 seconds (for peptide 191–212). Taken together these results on deuterium uptake at 10 seconds clearly indicate that Z  $\alpha_1$ AT exists in an altered native conformation compared to M  $\alpha_1$ AT and that there is significant disruption of hydrogen bonding in much of  $\beta$ -sheet A which is in agreement with our previously published data using site single point mutations and molecular dynamic simulations [11] [8].

Significant differences in the extent of deuterium exchange at longer labeling times were found within 7 peptides (Fig. 4 and 5), indicating dynamic and structural differences between the two proteins. One of the peptides (residues 339–353, the top of s5A and the RCL) includes the mutation site, Glu 342; this peptide was observed to be more mobile in Z  $\alpha_1$ AT (Fig. 4e). Also in this region was peptide 191–212 ( $\beta$ 3A- $\beta$ 4C) which displayed decreased deuterium uptake indicating that this region contains additional

hydrogen bonds and is more rigid in Z  $\alpha_1$ AT (Fig. 5). This increased rigidity may be due to stabilizing interactions between Lys342 and Glu199. Trp194 is located in this region, and the increased rigidity may appear to be at odds with previous results showing differences in Trp fluorescence between M and Z  $\alpha_1$ AT. We note, however, that while the region covered by the peptide containing Trp194 shows decreased exchange at short times, the top of  $\beta$ 5A, which is immediately adjacent to Trp194, shows increased exchange, indicating a more dynamic local environment. We therefore conclude that there is no inconsistency between the fluorescence and H/D exchange data. These changes in deuterium uptake suggests that the interactions within the vicinity of the mutation are altered by the removal of the salt bridge between Glu342 and K290, which allows this region to sample a conformation in which the top of s5A is open. This open conformation is maintained by new interactions formed between Lys342 and Val200, Thr203 present within peptide 191–212 [11].

There are several regions, distant from the mutation site, whose structure and stability depend upon the residues they pack against such as helix A, B and H which are affected by the Z mutation

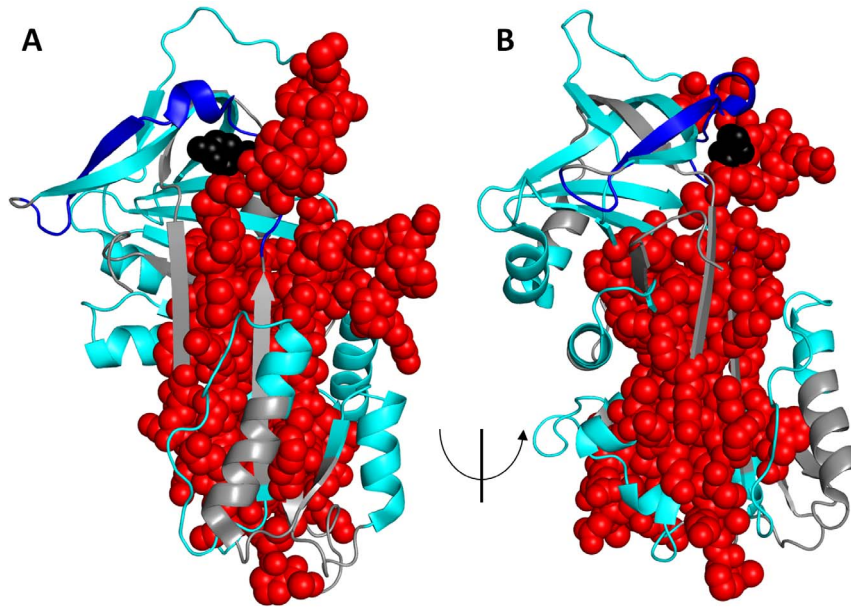

**Figure 8. Summary of differences in HDX between M and Z  $\alpha_1$ AT.** The structure of  $\alpha_1$ AT (PDB: 1QLP) [24] with Red spheres: regions showing increased HDX in Z. Dark blue: regions showing decreased HDX in Z. Cyan: regions showing no significant difference between M and Z. Grey: regions for which no peptides were analyzed.  
doi:10.1371/journal.pone.0102617.g008

[20,21]. We observe a significant increase in the flexibility of peptic fragments corresponding to the helix B in Z  $\alpha_1$ AT (Fig. 4a, b). Peptide 38–51 show a comparable behavior in both M and Z  $\alpha_1$ AT (Fig. 3a) whereas an increase in exchange is seen for residues 38–62 (Fig. 4a) suggesting that the increase in exchange can be attributed to the B. The flexibility in this region suggests that the amide hydrogen bonds in these peptides are less stable and the packing around the helix is loosened in Z relative to M  $\alpha_1$ AT and may explain the loss of helical structure seen in the CD spectra of Z  $\alpha_1$ AT [4,9].

What is apparent from the experimental data is reduced protection in the hydrophobic core of Z  $\alpha_1$ AT (Figs. 4 and 6). In fact, regions showing significantly increased exchange in Z  $\alpha_1$ AT form a nearly contiguous group that encompasses much of the core of the molecule (Figure 8). The exchange resistant core of M  $\alpha_1$ AT has previously been shown to consist of  $\beta$ -sheet rich regions [15,16]. In M  $\alpha_1$ AT, peptic fragments that are protected from exchange include  $\beta$ 2A,  $\beta$ 3A- $\beta$ 4C,  $\beta$ 2B- $\beta$ 3B and  $\beta$ 6A-hI, (101–119, 191–212, 227–240, 297–303) and are described as showing class 3 exchange in figure 7. For Z  $\alpha_1$ AT only residues (227–240) show significant protection with residues corresponding to  $\beta$ 2A,  $\beta$ 3A- $\beta$ 4C,  $\beta$ 2B- $\beta$ 3B and  $\beta$ 6A-hI demonstrating class 2 behaviour (Fig. 7). The peptide covering residues 227–240 are heavily protected from exchange in both M and Z  $\alpha_1$ AT with less than 10% of the hydrogen available for exchange exchanging in the experimental time frame. This peptide, which has been identified in several previous studies as being resistant to chemical denaturation [22,23] and has been proposed to play a role as folding initiator [23], remains unaffected by the Z mutation. The increased deuterium exchange seen for the ‘core’ peptides in Z  $\alpha_1$ AT may allow the molecule to sample conformations that on the folding pathway and lead to accumulation of the polymerogenic folding intermediate that the open sheet intermediate is on-

pathway and the loss of the salt bridge leads to enhanced lability and ability to switch to a polymerogenic conformation.

In conclusion, our data clearly demonstrates that the single mutation Glu342Lys results in global dynamic changes to the serpin fold. This in turns leads to an increase in the probability of Z  $\alpha_1$ AT sampling an open sheet structure capable of polymerisation.

## Materials and Methods

### Expression and purification of M and Z $\alpha_1$ AT

M and Z  $\alpha_1$ AT were expressed and purified from *P. Pastoris* as previously described [10].

### Peptide mapping by high performance liquid chromatography (HPLC)-Tandem mass spectrometry

Peptide mapping was carried out as previously described [15]. In brief, a total of 5  $\mu$ g (0.1 nmol) of purified M or Z  $\alpha_1$ AT in 100  $\mu$ L of 50 mM Tris (pH 8) and 50 mM NaCl was mixed with 95  $\mu$ L of 100 mM  $\text{NaH}_2\text{PO}_4$  (pH 2.4) followed by the addition of 5  $\mu$ g of porcine pepsin dissolved in 0.05% (v/v) TFA and  $\text{H}_2\text{O}$  for pepsin digestion. M or Z  $\alpha_1$ AT was digested for 5 min on ice. The digested sample was then injected into a micropeptide trap (Michrom Bioresources) connected to a C18 HPLC column (5 cm  $\times$  1 mm, Alltech) coupled to a LTQ linear ion-trap mass spectrometer (ThermoElectron). Peptic fragments were eluted using a gradient of acetonitrile (Burdick and Jackson) at a flow rate of 50  $\mu$ L/min for a tandem mass spectrometry experiment to sequence each peptic fragment. Peptic fragments were identified by using the search algorithm SEQUEST (ThermoElectron) and manual inspection.



## Hydrogen/Deuterium Exchange

A sample containing 5  $\mu\text{g}$  (0.1 nmol) of M or Z  $\alpha_1$ AT in 50 mM Tris (pH 8) and 50 mM NaCl was diluted 24-fold with 50 mM Tris and 50 mM NaCl dissolved in  $\text{D}_2\text{O}$  (Cambridge Isotope Laboratories) at 25°C to label the sample. The deuteration reaction was quenched at different time points by adding an equal volume of 100 mM  $\text{NaH}_2\text{PO}_4$  (pH 2.4) and quickly frozen in a dry ice–ethanol bath. Samples were stored at  $-80^\circ\text{C}$  until use.

## Isotope Analysis by HPLC–Electrospray Ionization Mass Spectrometry (ESI-MS)

The frozen sample was quickly thawed and digested with 5  $\mu\text{g}$  of pepsin on ice for 5 min followed by immediate injection into a micropeptide trap connected to a C18 HPLC column coupled to a Finnigan LCQ quadrupole ion-trap mass spectrometer. Peptic peptides were eluted in 12 min using a gradient of 10–45% acetonitrile at a flow rate of 50  $\mu\text{L}/\text{min}$ . The micropeptide trap and C18 HPLC column were immersed in ice to minimize back exchange. Because the mass of a peptic fragment increases by one for every amide hydrogen atom exchanged with deuterium, the amount of deuterium in each peptic fragment can be determined

by comparing the mass of a labelled peptic fragment with the mass of the same peptide without the label. The centroid mass of each peptic fragment was determined using the software package MagTran. To correct for the back-exchange reaction of hydrogen atoms during pepsin digestion and HPLC–MS, a fully deuterated sample was prepared by incubating 5  $\mu\text{g}$  of M or Z  $\alpha_1$ AT in 6 M guanidine deuteriochloride, 50 mM Tris (pH 8) and 50 mM NaCl for 60 min at 25°C. The deuterium incorporation of each peptic fragment, corrected for the back exchange, was calculated using the following equation:  $D/N = [(m - m_{0\%}) / (m_{100\%} - m)]$  where  $m$  is the mass of deuterated peptic fragment,  $m_{0\%}$  and  $m_{100\%}$  are the mass of the unlabeled and fully deuterated peptic fragments, respectively,  $N$  is the total number of exchangeable amide hydrogen atoms in each peptic fragment, and  $D$  is the number of amide hydrogen atoms incorporated in each peptic fragment.

## Author Contributions

Conceived and designed the experiments: VH RM PW SB. Performed the experiments: VH RM. Analyzed the data: VH RM PW SB. Wrote the paper: VH PW SB.

## References

- Gopu B, Lomas DA (2009) Conformational Pathology of the Serpins: Themes, Variations, and Therapeutic Strategies. *Ann Rev Biochem* 78: 147–176.
- Blanco I, Fernández E, Bustillo EF (2001) Alpha-1-antitrypsin PI phenotypes S and Z in Europe: an analysis of the published surveys. *Clin Gen* 60: 31–41.
- Knaupp AS, Bottomley SP (2009) Serpin Polymerization and Its Role in Disease-The Molecular Basis of alpha(1)-Antitrypsin Deficiency. *Iubmb Life* 61: 1–5.
- Knaupp AS, Levina V, Robertson AL, Pearce MC, Bottomley SP (2010) Kinetic Instability of the Serpin Z [alpha]1-Antitrypsin Promotes Aggregation. *J Mol Biol* 396: 375–383.
- Fregonese L, Stolk J (2008) Hereditary alpha-1-antitrypsin deficiency and its clinical consequences. *Orphanet Journal of Rare Diseases* 3: 16.
- Lomas DA, Evans DL, Finch JT, Carrell RW (1992) The mechanism of Z alpha 1-antitrypsin accumulation in the liver. *Nature* 357: 605–607.
- Yu MH, Lee KN, Kim J (1995) The Z type variation of human alpha 1-antitrypsin causes a protein folding defect. *Nat Struct Biol* 2: 363–367.
- Knaupp AS, Bottomley SP (2011) Structural Change in B-Sheet A of Z1-Antitrypsin Is Responsible for Accelerated Polymerization and Disease. *J Mol Biol* 413: 888–898.
- Lomas DA, Evans DL, Stone SR, Chang WS, Carrell RW (1993) Effect of the Z mutation on the physical and inhibitory properties of alpha 1-antitrypsin. *Biochem* 32: 500–508.
- Levina V, Dai WW, Knaupp AS, Kaiserman D, Pearce MC, et al. (2009) Expression, purification and characterization of recombinant Z alpha(1)-Antitrypsin-The most common cause of alpha(1)-Antitrypsin deficiency. *Prot Exp and Purification* 68: 226–232.
- Kass I, Knaupp AS, Bottomley SP, Buckle AM (2012) Conformational properties of the disease-causing Z variant of alpha1-antitrypsin revealed by theory and experiment. *Biophys J* 102: 2856–2865.
- Mahadeva R, Dafforn TR, Carrell RW, Lomas DA (2002) 6-mer peptide selectively anneals to a pathogenic serpin conformation and blocks polymerization - Implications for the prevention of Z alpha(1)-antitrypsin-related cirrhosis. *Journal of Biological Chemistry* 277: 6771–6774.
- Chang WS, Wardell MR, Lomas DA, Carrell RW (1996) Probing serpin reactive-loop conformations by proteolytic cleavage. *J Biol Chem* 314: 647–653.
- Wales TE, Engen JR (2006) Hydrogen exchange mass spectrometry for the analysis of protein dynamics. *Mass Spectrometry Reviews* 25: 158–170.
- Tsutsui Y, Liu L, Gershenson A, Wintrodde PL (2006) The conformational dynamics of a metastable serpin studied by hydrogen exchange and mass spectrometry. *Biochem* 45: 6561–6569.
- Tsutsui Y, Kuri B, Sengupta T, Wintrodde PL (2008) The Structural Basis of Serpin Polymerization Studied by Hydrogen/Deuterium Exchange and Mass Spectrometry. *J Biol Chem* 283: 30804–30811.
- Deng Y, Smith DL (1999) Rate and Equilibrium Constants for Protein Unfolding and Refolding Determined by Hydrogen Exchange-Mass Spectrometry. *Anal Biochem* 276: 150–160.
- Bai Y, Milne JS, Mayne L, Englander SW (1993) Primary structure effects on peptide group hydrogen exchange. *Proteins: Structure, Function, and Genetics* 17: 75–86.
- Cabrita LD, Dai WW, Bottomley SP (2004) Different conformational changes within the F-helix occur during serpin folding, polymerization, and proteinase inhibition. *Biochem* 43: 9834–9839.
- Back J-H, Yang WS, Lee C, Yu M-H (2009) Functional Unfolding of  $\alpha_1$ -Antitrypsin Probed by Hydrogen-Deuterium Exchange Coupled with Mass Spectrometry. *Molecular & Cellular Proteomics* 8: 1072–1081.
- James EL, Bottomley SP (1998) The mechanism of alpha(1)-antitrypsin polymerization probed by fluorescence spectroscopy. *Arch Biochem and Biophys* 356: 296–300.
- Krishnan B, Gierasch LM (2011) Dynamic local unfolding in the serpin  $\alpha_1$ -antitrypsin provides a mechanism for loop insertion and polymerization. *Nat Struct Mol Biol* 18: 222–226.
- Tew DJ, Bottomley SP (2001) Probing the equilibrium denaturation of the serpin alpha(1)-antitrypsin with single tryptophan mutants; Evidence for structure in the urea unfolded state. *J Mol Biol* 313: 1161–1169.
- Elliott PR, Abrahams J-P, Lomas DA (1998) Wild-type [alpha]1-antitrypsin is in the canonical inhibitory conformation. *Journal of Molecular Biology* 275: 419–425.
